# Supplementary material
Source: PubMed Central journal article supplement (PMC7564891)
Supplement: NIHMS1550160-supplement-1.pdf [file NIHMS1550160-supplement-1.pdf]

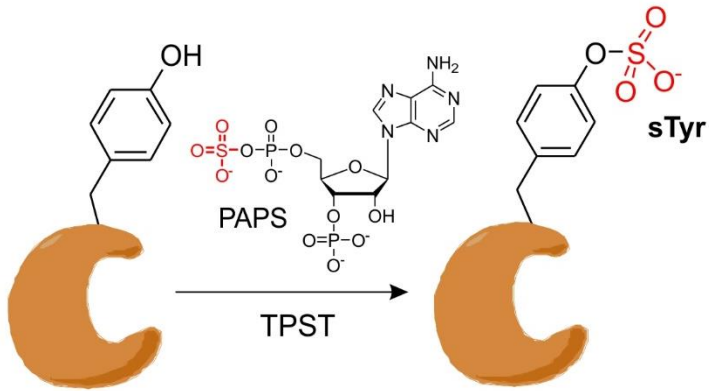

**Supplementary Figure 1.** Proteins processed through the trans-Golgi network in multicellular eukaryotes are subjected to tyrosine sulfation by two Tyrosylprotein Sulfotransferase (TPST) enzymes that use PAPS as the cofactor.

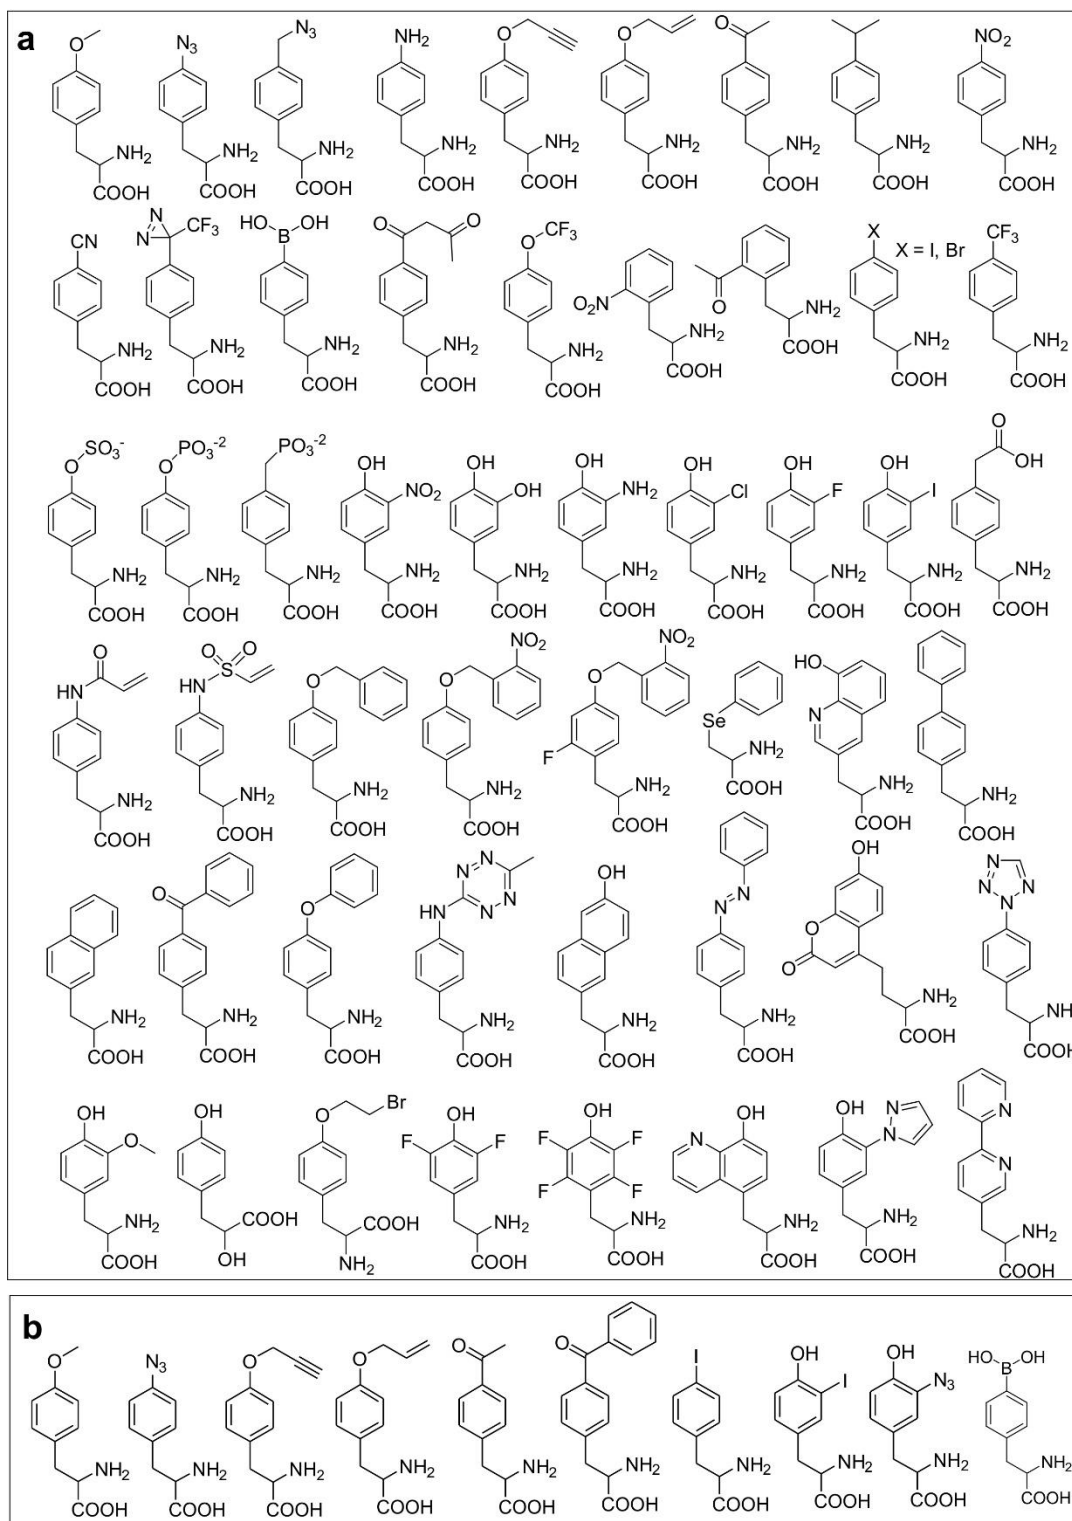

**Supplementary Figure 2.** Many more nCAAs have been genetically encoded in *E. coli* using the MjTyrRS/tRNA pair (**a**) than in eukaryotes using the EcTyrRS/tRNA pair (**b**).

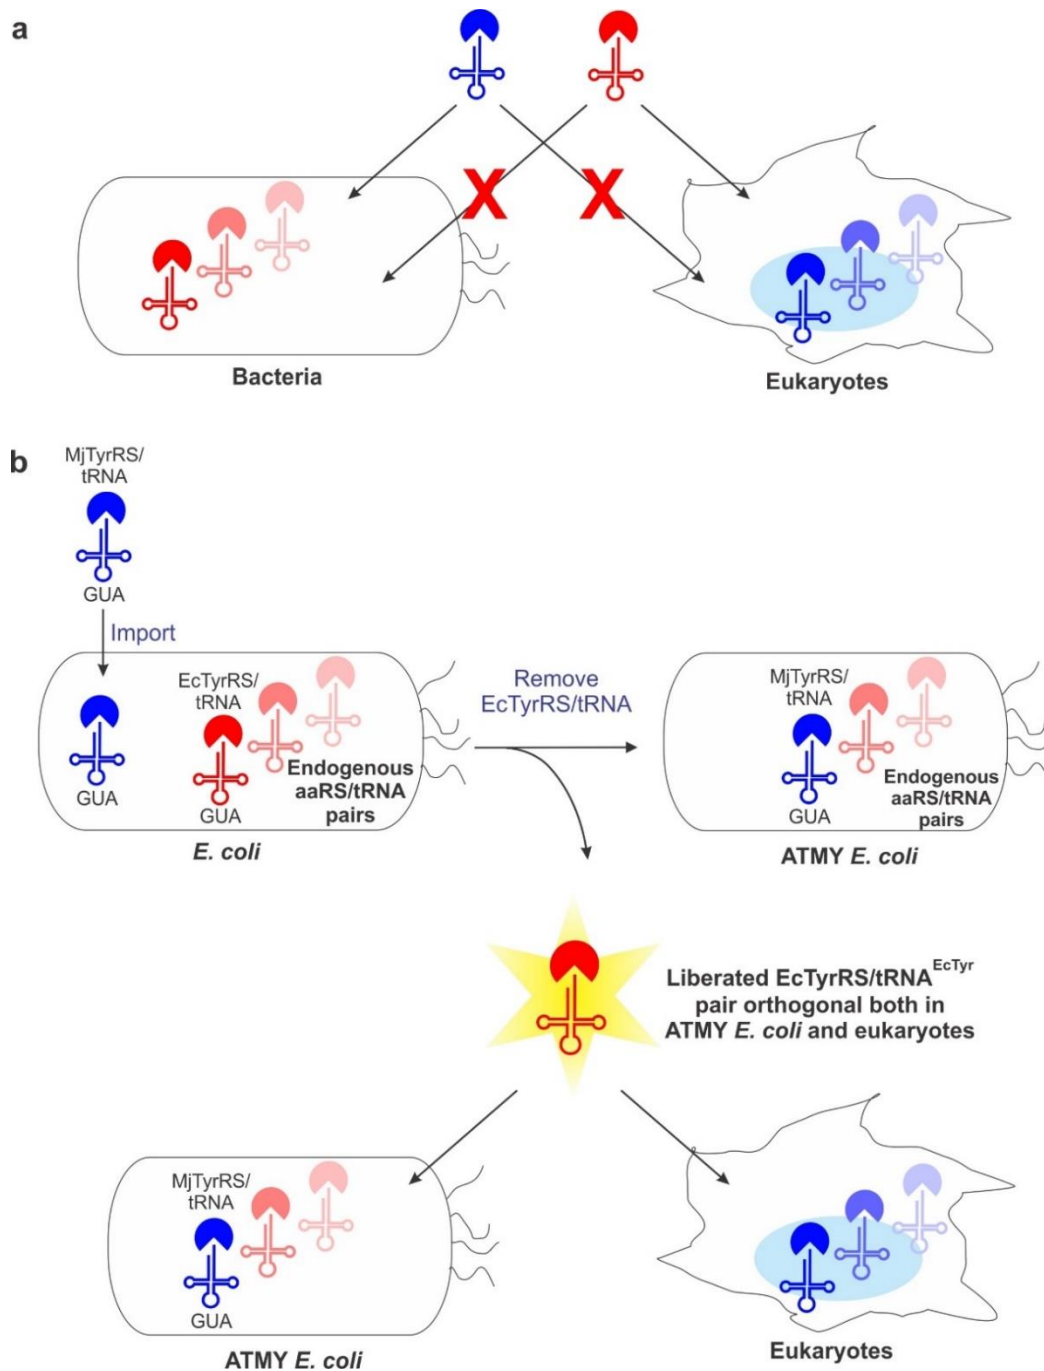

**Supplementary Figure 3. a**, Typically, the bacteria-derived aaRS/tRNA pairs (color-coded red) are orthogonal in eukaryotes and can be used for eukaryotic genetic code expansion, while eukaryote or archaea derived pairs (color-coded blue) are orthogonal in bacteria and are useful for bacterial genetic code expansion. **b**, Functionally substituting the EcTyrRS/tRNA pair in *E. coli* with the archaea derived MjTyrRS/tRNA pair creates an engineered ATMY strain. The ‘liberated’ EcTyrRS/tRNA pair can be established as an orthogonal nonsense suppressor in ATMY *E. coli*, and engineered in this strain for altering its substrate specificity.

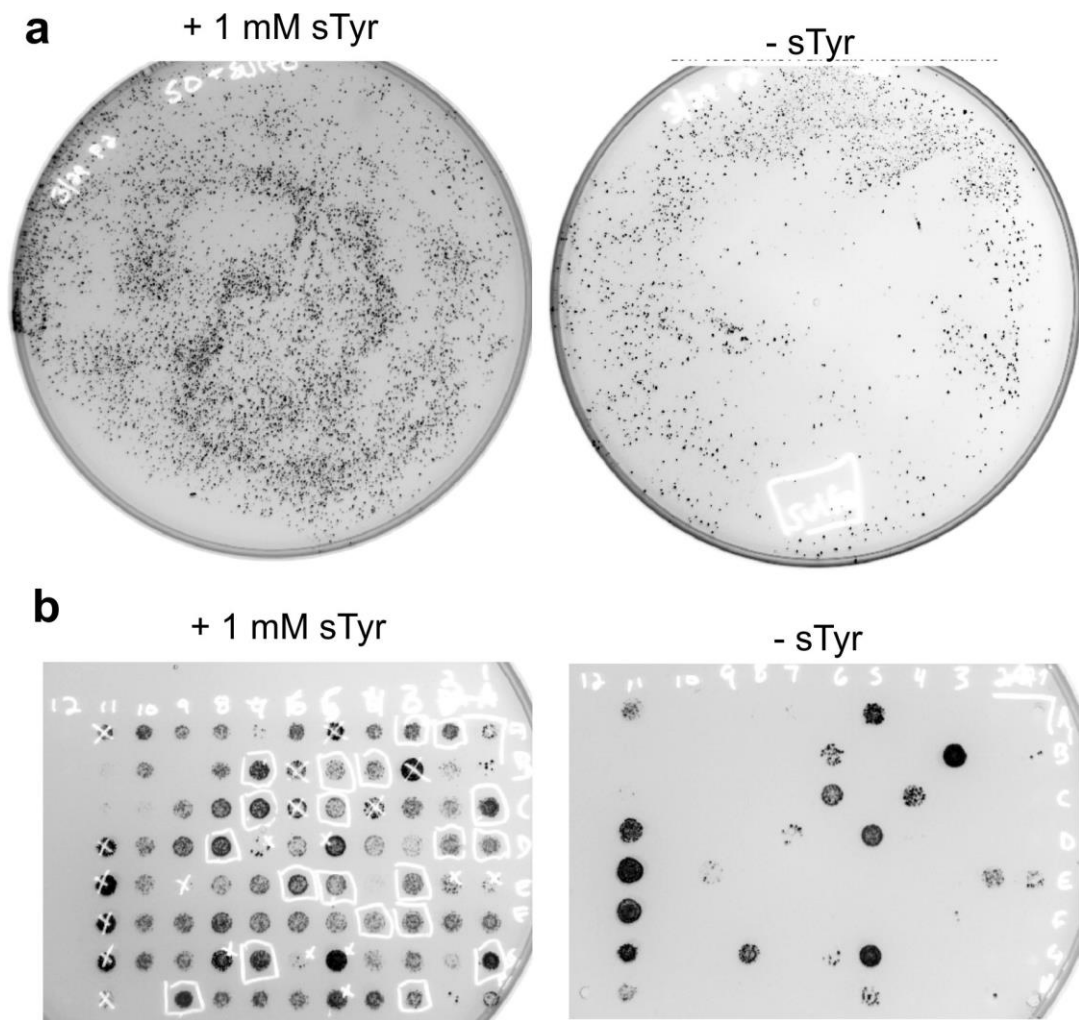

**Supplementary Figure 4.** **a**, The pool of EcTyrRS library of mutants selected through a single round each of positive and negative selection show substantial sTyr-dependent survival in a subsequent round of positive selection. **b**, Many individual clones isolated from these plates also show the same phenotype. These experiments were performed once.

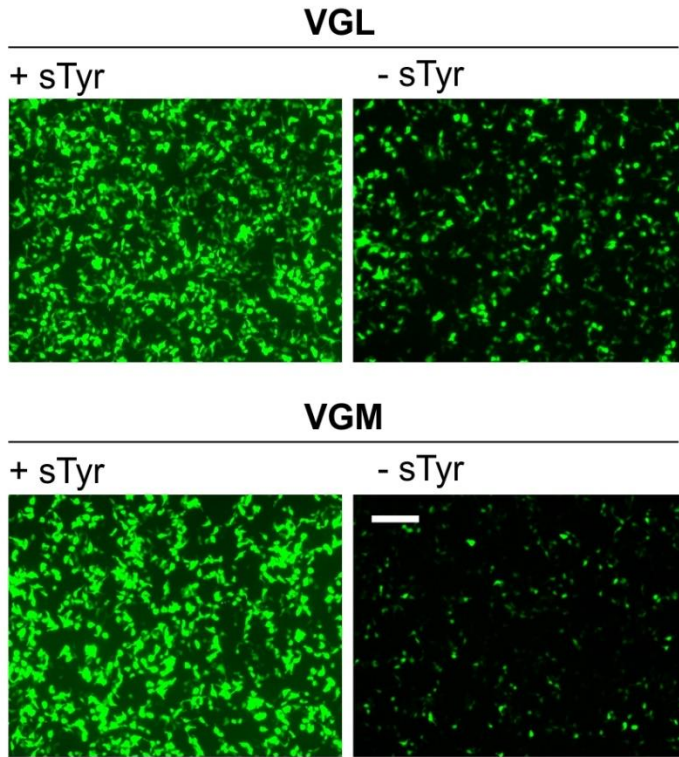

**Supplementary Figure 5.** Fluorescence images of HEK293T cells expressing EGFP-39-TAG reporter using VGL- or VGM-EcTyrRS mutant in the presence or absence of sTyr (1 mM). These experiments were performed at least three times with similar results.

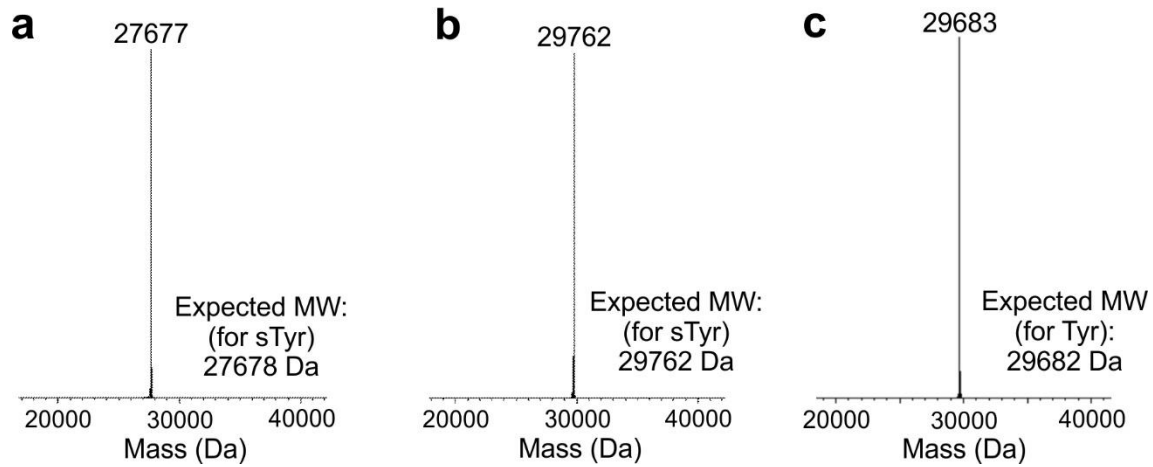

**Supplementary Figure 6.** ESI-MS analysis of the purified GFP reporter proteins. **a**, Deconvoluted mass of sfGFP-151-TAG reporter expressed in ATMY *E. coli* support incorporation of sTyr. **b**, EGFP-39-TAG reporter expressed in the presence of sTyr in mammalian cells show incorporation of sTyr; **c**, the same reporter expressed in the absence of sTyr show the incorporation of tyrosine. These MS analyses were performed at least twice with similar results.

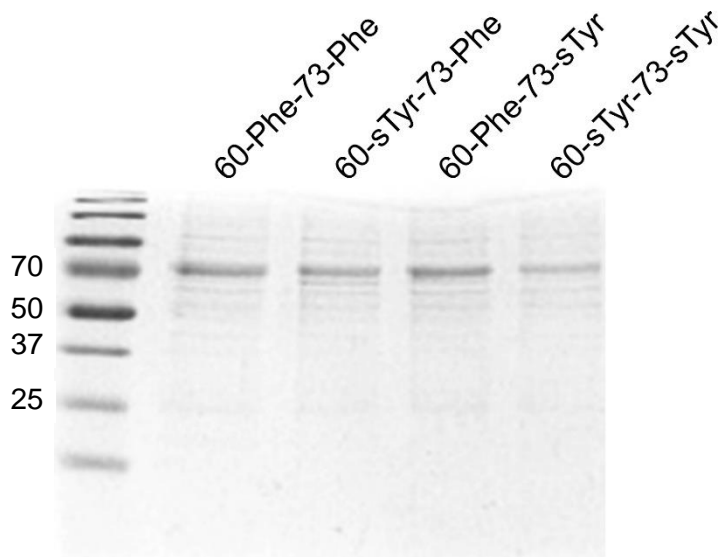

**Supplementary Figure 7.** SDS-PAGE analysis of secreted HCII mutants expressed in HEK293T cells and isolated from the culture media using a C-terminal polyhistidine tag. Due to well-established glycosylations, the observed molecular weight is significantly larger than what is predicted from the primary sequence (~57 kDa). SDS-PAGE analyses of various HCII preparations were performed at least three times with similar results.

Peptide harboring 60-sTyr  
ENTVTNDWIPEGEEDDDY\*LDLEK  
Expected m/z (+2): 1410.07

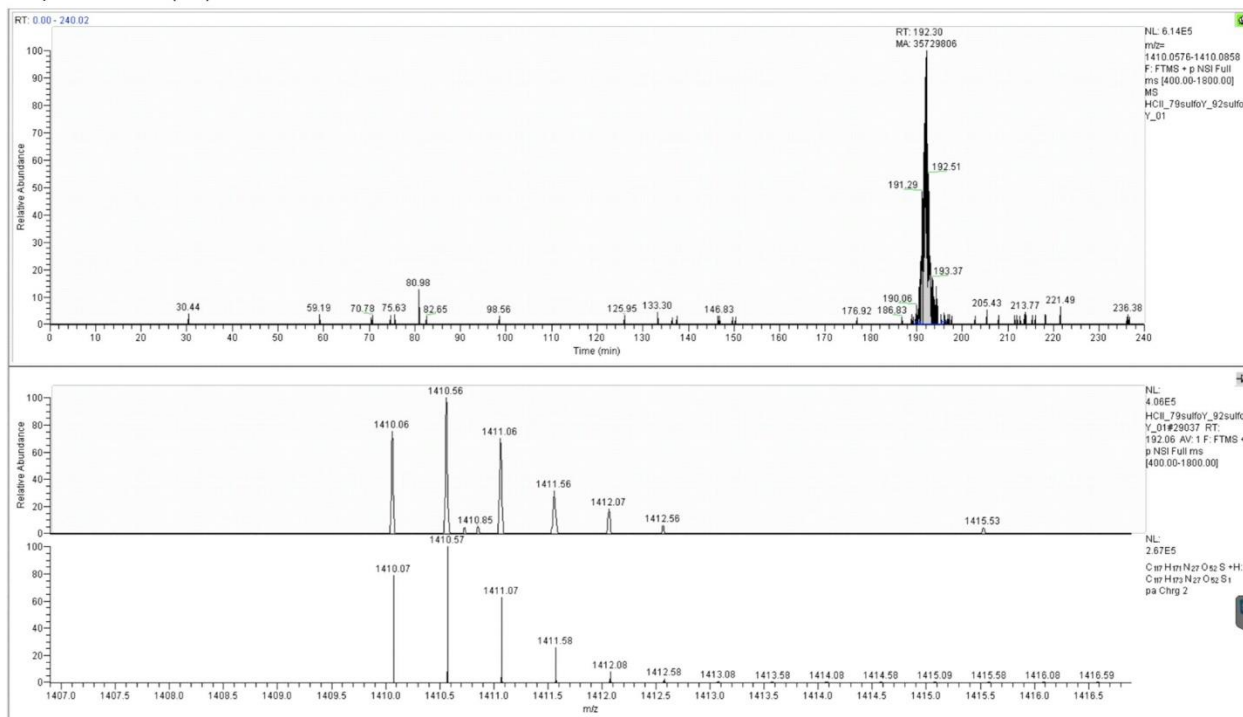

**Supplementary Figure 8.** Trypsin digestion followed by LC-MS analysis of HCII-60-sTyr-73-sTyr isolated from HEK293T cells identifies the presence of the peptide harboring 60-sTyr. These experiments were performed twice with similar results.



Peptide harboring 73-sTyr  
FSEDDDY\*IDIV  
Expected m/z (+2): 705.77

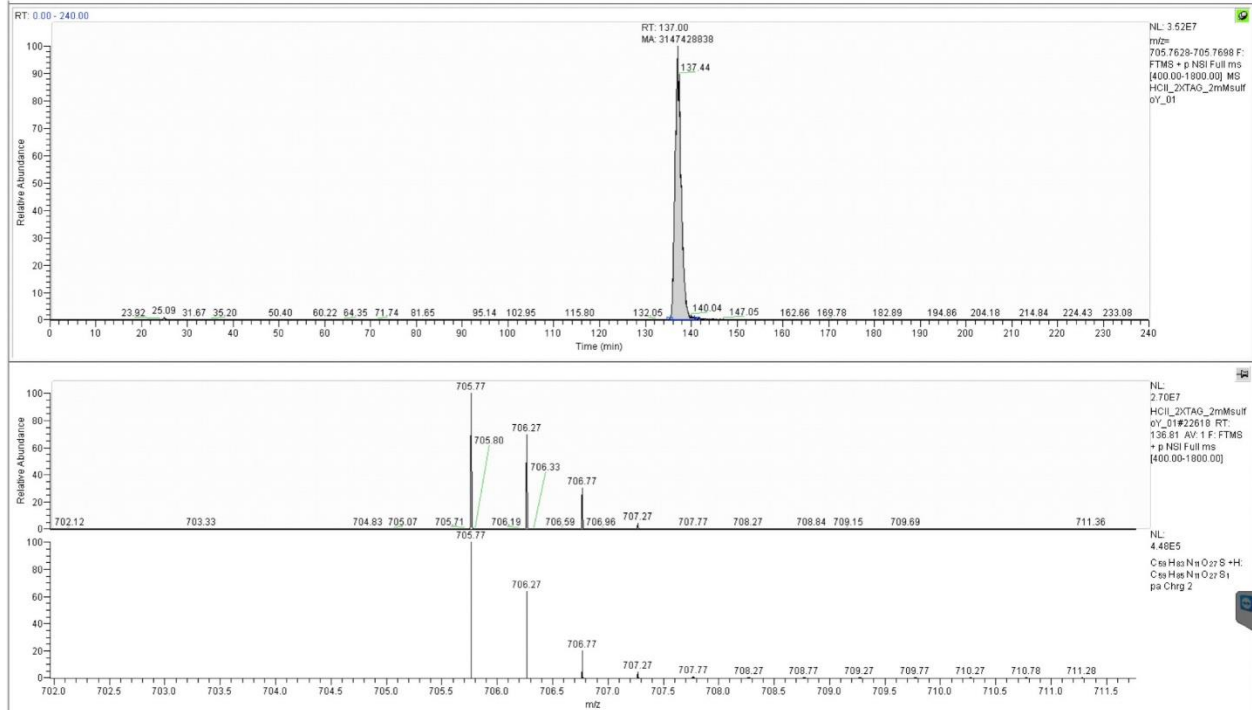

**Supplementary Figure 9.** Trypsin + elastase double digestion followed by LC-MS analysis of HCII-60-sTyr-73-sTyr isolated from HEK293T cells identifies the presence of the peptide harboring 73-sTyr. We were unable to find the HCII fragment harboring the 73 residue through trypsin digestion alone, likely due to its large predicted size. These experiments were performed twice with similar results.

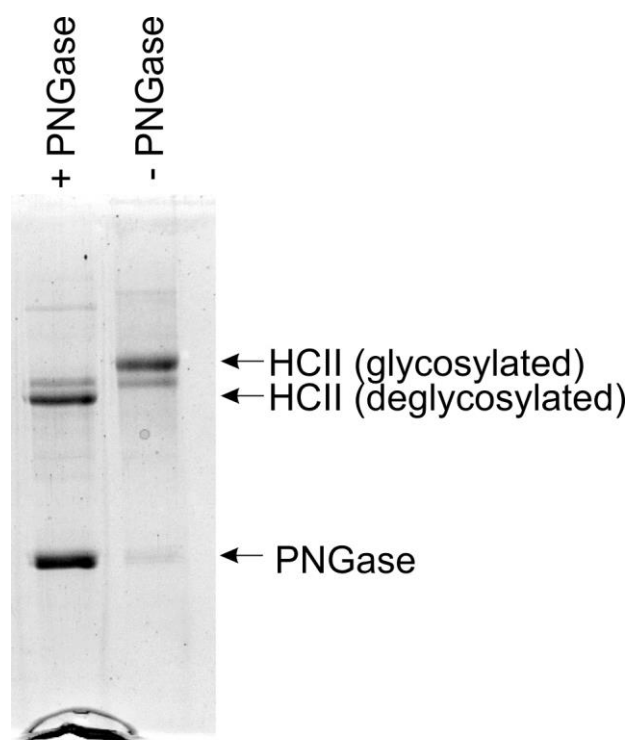

**Supplementary Figure 10.** PNGase F treatment of purified HCII-60-sTyr-73-sTyr substantially reduces its molecular weight by removing N-linked glycans. This experiment was performed only once.

**Anti-sTyr WB:**

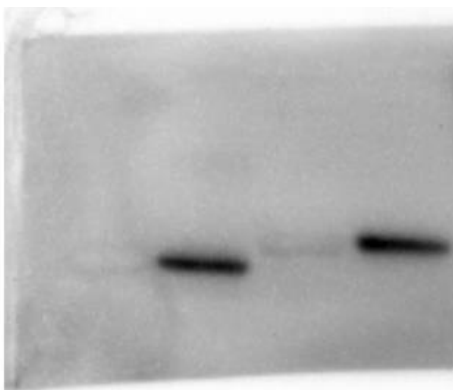

**Anti-polyhistidine WB:**

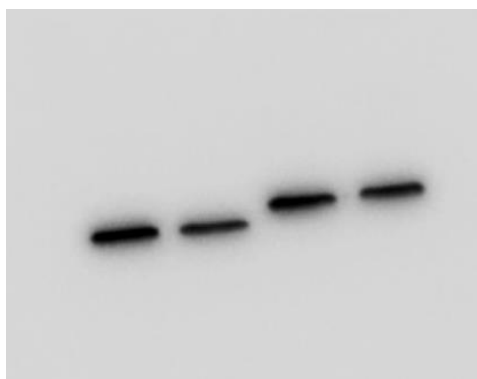

**Coomassie:**

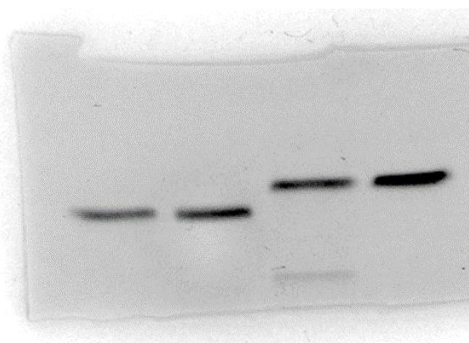

**Supplementary Figure 11.** Picture of full gels associated with Figure 1d.

**Supplementary Table 1: List of oligonucleotides**

| <b>Primer Name</b> | <b>Sequence</b>                                              |
|--------------------|--------------------------------------------------------------|
| pBK seqT-F         | ATTACGCTGACTTGACGGGACGG                                      |
| EcYRS-L71-oR       | CGCAACCGGCTTGTGGCCCGCCTGC                                    |
| EcYRS-L71-NBT-F    | GCAGGCGGGCCACAAGCCGGTTGCnbtGTAGGCGGCGGACGGGTCTGATTG          |
| EcYRS-N126-oR      | GTTCCGCCGATAGCAGAGTTTTTC                                     |
| EcYRS-N126x-F      | GAAAACTCTGCTATCGCGGCGAACnnnTATGACTGGTTCGGCAATATGAATGTGCTGAC  |
| pBK MCS JlsqR      | GAGATCATGTAGGCCTGATAAGCGTAGC                                 |
| EcYRS-NheI-F       | GCTAGCGCCACCATGGCAAGCA                                       |
| EcYRS-XhoI-R       | aataatCTCGAGTTATTTCCAGCAAATCAGACAGTAATTCTTTTTACC             |
| HCII-SfiI-F        | TGGCAAAGAATTGGCCAAGGAGGCCACCATGAAACACTCATTAAACGCACTTC        |
| 10xHis-TGA-SfiI-R  | TGGCGGCCGGCCAGGCCTCAATGATGGTGGTGATGATGATGGTGATGATG           |
| HCII-79-Phe-R      | GTCGTCGTCTTCACTGAATATCTTCTCCAGGTCCAGaaaGTCGTCGTCTCTCTCCCC    |
| HCII-79-TAG-R      | GTCGTCGTCTTCACTGAATATCTTCTCCAGGTCCAGctaGTCGTCGTCTCTCTCCCC    |
| HCII-92-Phe-F      | CTGGACCTGGAGAAGATATTCAGTGAAGACGACGACtttATCGACATCGTCGACAGTCTG |
| HCII-92-TAG-F      | CTGGACCTGGAGAAGATATTCAGTGAAGACGACGACtagATCGACATCGTCGACAGTCTG |
| HCII-80-iF         | CTGGACCTGGAGAAGATATTCAGTGAAGACGACGAC                         |
| HCII-80-iR         | GTCGTCGTCTTCACTGAATATCTTCTCCAGGTCCAG                         |

**Supplementary note: Plasmid maps and sequences**

*pBIU-Sulfo-16xtYR-TAG*:

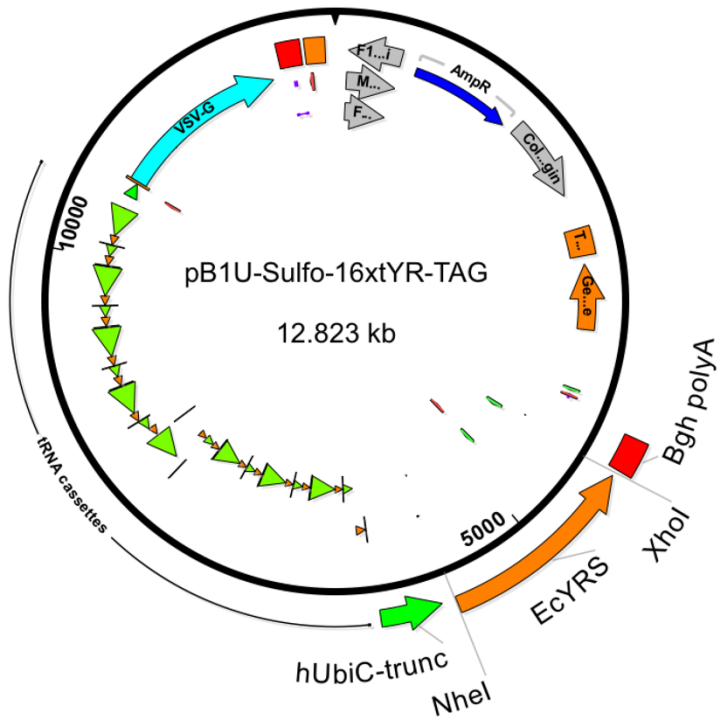

ttctctgtcacagaatgaaaatcttctgtcatctcttcggttattaatggttgaattgactgaatatcaacgcttattgcagcctgaatggcgaatgg  
gacgcgacctgtagcggcgcattaagcgcggcgggtgtggtggttacgcgcagcgtgaccgtacactgccagcgccttagcggccgc  
tccttcgctttctcccttcttctcgtccacgttcgccggttccccgtcaagctctaaatcgggggctcccttaggggtccgatttagtgcctt  
acggcacctcgaccccaaaaacttgattaggggtgatggttcacgtagtgggcatcgcctgatagacggttttcgcccttgacggttga  
gtccacgttcttaatagtgactcttgttccaaactggaacaacactcaaccctatctcggctattcttttgattataagggattttgccgattc  
ggcctattggttaaaaaatgagctgatttaacaaaatftaacgcgaatttaacaaaatattaacgtttacaattcaggtggcacttttcgggga  
aatgtgcgcggaaccctattgtttattttctaaatactcaaatatgtatccgctcatgagacaataaccctgataaatgctcaataatattg  
aaaaaggagagatgagtattcaacattccgtgtcgccttattccctttttgcggcattttgccttctgttttgctaccagaaacgctgg  
tgaaagtaaaagatgctgaagatcagttgggtgcacgagtggttacatcgaactggatcacaacagcggtaagatccttgagagttttcc  
ccgaagaacgtttccaatgatgagcacttttaagtctgtatgtggcgcggtattatcccgtattgacgccgggcaagagcaactcggctc  
ccgcatacactattctcagaatgacttggtgagtactcaccagtcacagaaaagcatcttacggatggcatgacagtaagagaattatgcag  
tgctgccataacctgagtataactgcggccaacttactctgacaacgatcggaggaccgaaggagtaaccgctttttgcacaacat  
gggggatcatgtaactcgccttgatcgttgggaaccggagctgaatgaagccatacacaacgacgagcgtgacaccacgatgcctgtagc  
aatggcaacaacgttgcgcaactattaactggcgaactacttactgacttcccggcaacaattaatagactggatggagcgggataaagt  
tgcaggaccacttctgcgctcggccctccggctggtgtttattgctgataaatctggagccggtgagcgtgggtctcgcggtatcattgc  
agcactggggccagatgtaagccctccgtatcgtattctacacgacggggagtcaggcaactatggatgaacgaaatagacagat  
cgctgagataggtgctcactgattaagcattggtaactgtcagaccaagttactcatatatacttttagattgattaaaactcatttttaattaa  
aaggatctaggtgaagatccttttgataatctcatgacaaaatccctaactgagtttctgtccactgagcgtcagaccccgtagaaaaga  
tcaaaggatcttctgagatcctttttctgcgcgtaactctgctgcttcaacaaaaaaaccaccgctaccagcgggtgtttgttccgggatc  
aagagctaccaactcctttccgaaggtaactggcttcagcagagcgcagataccaaaactgtccttctagtgtaccgtagttagccacc  
acttcaagaactctgtagcaccgctacatacctcgtctgtaactctgttaccagtggtcgtgccagtgccgataagtcgtgtcttaccgg

gttgactcaagacgatagttaccggataaggcgcagcggctgggctgaacggggggttcgtgcacacagcccagcttggagcgaacg  
acctacaccgaactgagatacctacagcgtgagcattgagaaagcggcacgctcccgaaggaggaaagggacaggtatccggtaag  
cggcagggtcggaacaggagagcgcacaggggagcttccagggggaaacgcctggatctttatagctgtcgggttccacctctg  
acttgagcgtcgattttgtgatgctcgtcagggggcggagcctatggaaaaacgccagcaacgcggccttttacggctcctggcctttg  
ctggcctttgctcacatgttcttctcgttatcccctgattctgtggataaccgtattaccgctttgagtgagctgataccgctcggcgcagc  
cgaacgaccgagcgcagcagtcagtgagcgggaagcggaaagagcgcctgatgcggtattttccttacgcatctgtgcggtatttcac  
accgcagaccagccgcgtaacctggcaaaatcggttacggttgagtaataaatggatgcctgcgtaagcgggtggtggcggacaataaa  
gtcttaaaactgaacaaaatagatctaaactatgacaataaagtcttaaaactagacagaatagttgtaaaactgaaatcagtcagttatgctgtga  
aaaagcatactggactttgtatggctaaagcaaaactcttctttctgaagtgcaaaftgccgctgtattaaagagggggcgtggccaaggg  
catggtaaagactatattcggcgttgtaacaattaccgaacaactccgcggccgggaagccgatctcggcttgaacgaattgttaggtg  
gcggtacttgggtcgatataaagtgcatcacttctcccgtatgccaactttgtatagagagccactgcccgatcaccgtaactgtcttg  
cacgtagatcacataagcaccagcgcgttggcctcatgcttgaggagattgatgagcgcgggtggcaatgccctgcctccgggtgctcggc  
gagactgagatcatagatagatctcactacgggctgctcaaacctgggcagaacgtaagccgcgagagcggcaacaaccgcttct  
tggtcgaaggcagcaagcgcgatgaatgcttactacggagcaagttcccaggtaatcggagtccggctgatgttgggagtaggtggcta  
cgtctccgaactcacgaccgaaaagatcaagagcagcccgatggatttgaacttggcagggccgagcctacatgtgcgaatgatgccat  
acttgagccactaactttgttttagggcgactgccctgctgcgtaaacatcgttgcgtgctgtaaacatcgttgcctcactaacaatcaaacat  
cgaccacggcgtaacgcgcttgcgttggatgccgagggatagactgtacaaaaaacagtcataacaagccatgaaaaccgccact  
gcccgttaccaccgctgcgttcgggtcaaggttctggaccagttgcgtgagcgcatacgtactgcattacagtttacgaaccgaacaggc  
ttatgtcaactgggtcgtgccttcatccgtttccacgggtgctgcacccggcaaccttgggcagcagcgaagtcgagggcatttctgtcctgg  
ctggcgaacgagcgcgaaggttccgctccacgcacatcgcaggcattggcggccttgcgttcttctacggcaaggtgctgtgcacggatct  
gccctggcttcaggagatcggtagacctggccgctcggcggcgttccgggtgctgacccggatgaagtggtcgcacctcctgggtttc  
tggaaaggcagcagcgttttctgcccaggactctagctatagttctagtgttggctacgtaccgtagtggtatggcagggttgcgctta  
atgcgccgtacagggcgcgtggggataccccctagagcccagctggttcttccgctcagaagccatagagcccaccgcatccccag  
catgcctgctattgtcttccaatctcccccttgcgtcctgccccaccaccaccagaatagaatgacacctactcagacaatgcgatgc  
aatttctcattttattagaaaggacagtgagggtggcacttccagggtcaaggaaaggcacgggggaggggcaacaacagatggctg  
gcaactagaaggcacagtcgagggctgatcaggggttaaacggccctctagactcagttatttccagcaaatcagacagtaattctttta  
ccgcgacgcagtaaggtaaacgacaaacagacgatcttctttaaagaagtattcaggatcggactgttttaccggtaatggtgatgg  
cattggaggcgatagtttactgcttaccaccgggaaggttcagttcagaatcaccagtgctcgcacccctttccatctc  
aacctcggtagccgctcctgcgccagctgtcgaagtccgcttactcagcgcactcaagaaccgctgaacaggcattcggtataacggt  
ttgccgctgtaaaccttctaccgtgaaccagacgagtcactgctccgccagtacatactgggcgcgcggtgcttaccgctgttttatct  
tcttctccagggcgttgatcttcaatgctcataaaggtgaagaactcaggaagcggtaaacgctggcatccgcagtggtgatccagaact  
ggtagaattgtacgggctggtttcttccgatccaaccagactgcgccctcagtttaccaaaattgggtgccatctgctttagtgatcagcg  
gaacggtcaggccaaacactgattctgatcgagacgacgggtcaggtcgataccagaagtgatgttaccctactggtcagaaccacaa  
tttgacgaccacaccgactgtttgtCAAacaggccatacTataacctgCagcaggtttaggaaaactcagtgaaacaaatccct  
gaTcttcacggttgagacgctgcttaaccgcttcttggatcatctggttaacggagaagtgttgccaatcgcgcaggaaggtcagcac  
attcatattgccgaaccagtcataatattggccgcgatagcagagtttctccacagtcgaaatcaggaacggggcaacctgcttacggatt  
ttgtccaccactcctgaacagtttctcgggttccagcttacgctcggcagcttgaagctcgggtcgccaatcagaccgctcgcgccgcta  
ccagcgaaccggcttgtgcccgcctgctggaagcgtttcaggcataacaatggaacaagatgccccaaatgcaagctgcagcggtag  
gatcgaagccacaCACgagtgatcgggcttgcgccagtcgctctgtaaacgcttctcgtccgctcactgggctaccagccccgc  
tcttgaattgttaatacaagtactgcttccatGGTGGCgctagccagcttgggtctccctatagtgagtcgtaataatcagataagcca  
gtaagcagtggttctctagttagccagagagctCtagaccaagtgacgatcacagcgtaccacaacaagaaccgcgacccaaatccc  
ggctgcagcgaactagctgtgccacaccggcgcgcttataatcatcggcgttaccgccccacggagatccctccgagaatcg  
ccgagaagggactactttctcgcctgttccgctctctggaagaaaaccagtgccctagatcacccaagtcctcctaaaatgctcctct

gctgatactggggttctaagggcagtgctttagagcagcggggccgctgtcctgagcgtccgggcggaaggatcaggacgctcgctgcgc  
ccttcgtctgacgtggcagcgtcgcggtgaggagggggcgccccggggaggcgccaaaaccggcgcgaggccttcaacggC  
CACTAGCAAAAAATGGAGGGGGACGGATTCGAACCGCCGAACCCAAAGGGAGCGG  
ATTTAGAGTCCGCCGCGTTTAGCCACTTCGCTACCCCTCCGGTGTCTCTACTGAT  
AGGGAACCTTATAAGTCTCTACTGATAGGGATTTACGTTTATGGTGATTTCCCA  
GAACACATAGCGACATGCAAATATTA AAAAATGGTGGGGGAAGGATTCGAACCTTC  
GAAGTCTGTGACGGCAGATTTAGAGTCTGCTCCCTTTGGCCGCTCGGGAACCCACC  
GGTGTTCGTCCTTTCCACAAGATATATAAAGCCAAGAAATCGAAATACTTTCAAGT  
TACGGTAAGCATATGATAGTCCATTTTAAAACATAATTTTAAAACCTGCAAACCTACC  
AAGAAATTACTTTCTACGTCACGTATTTTGTACTAATATCTTTGTGTTTACAGTC  
AAATTAATTCTAATTATCTCTCTAACAGCCTTGTATCGTATATGCAAATATGAAGGA  
ATCATGGGAAATAGGCCCTCTTCCTGCCCGAcCTAGCAAAAAATGGAGGGGGACGG  
ATTCGAACCGCCGAACCCAAAGGGAGCGGATTTAGAGTCCGCCGCGTTTAGCCACT  
TCGCTACCCCTCCGGTGTCTCTACTGATAGGGAACCTTATAAGTCTCTACTGTA  
TAGGGATTTACGTTTATGGTGATTTCCAGAACACATAGCGACATGCAAATATTA  
AAAATGGTGGGGGAAGGATTCGAACCTTCGAAGTCTGTGACGGCAGATTTAGAGTC  
TGCTCCCTTTGGCCGCTCGGGAACCCACCAGGTGTTTCGTCCTTTCCACAAGATATAT  
AAAGCCAAGAAATCGAAATACTTTCAAGTTACGGTAAGCATATGATAGTCCATTTTA  
AACATAATTTTAAAACCTGCAAACCTACCCAAGAAATTACTTTCTACGTCACGTA  
TTTTGTACTAATATCTTTGTGTTTACAGTCAAATTAATTCTAATTATCTCTCTAACAG  
CCTTGTATCGTATATGCAAATATGAAGGAATCATGGGAAATAGGCCCTCTTCCTGCC  
CGACCTAGCAAAAAATGGAGGGGGACGGATTCGAACCGCCGAACCCAAAGGGAGC  
GGATTTAGAGTCCGCCGCGTTTAGCCACTTCGCTACCCCTCCGGTGTCTCTACTG  
ATAGGGAACCTTATAAGTCTCTACTGATAGGGATTTACGTTTATGGTGATTTCCC  
AGAACACATAGCGACATGCAAATATTA AAAAATGGTGGGGGAAGGATTCGAACCTT  
CGAAGTCTGTGACGGCAGATTTAGAGTCTGCTCCCTTTGGCCGCTCGGGAACCCACC  
CGGTGTTTCGTCCTTTCCACAAGATATATAAAGCCAAGAAATCGAAATACTTTCAAG  
TTACGGTAAGCATATGATAGTCCATTTTAAAACATAATTTTAAAACCTGCAAACCTACC  
CAAGAAATTACTTTCTACGTCACGTATTTTGTACTAATATCTTTGTGTTTACAGT  
CAAATTAATTCTAATTATCTCTCTAACAGCCTTGTATCGTATATGCAAATATGAAGG  
AATCATGGGAAATAGGCCCTCTTCCTGCCCGAcCTAGCAAAAAATGGAGGGGGACG  
GATTCGAACCGCCGAACCCAAAGGGAGCGGATTTAGAGTCCGCCGCGTTTAGCCAC  
TTCGCTACCCCTCCGGTGTCTCTACTGATAGGGAACCTTATAAGTCTCTACTG  
ATAGGGATTTACGTTTATGGTGATTTCCAGAACACATAGCGACATGCAAATATTA  
AAAATGGTGGGGGAAGGATTCGAACCTTCGAAGTCTGTGACGGCAGATTTAGAGT  
CTGCTCCCTTTGGCCGCTCGGGAACCCACCAGGTGTTTCGTCCTTTCCACAAGATATA  
TAAAGCCAAGAAATCGAAATACTTTCAAGTTACGGTAAGCATATGATAGTCCATTTT  
AAAACATAATTTTAAAACCTGCAAACCTACCCAAGAAATTACTTTCTACGTCACGT  
ATTTTGTACTAATATCTTTGTGTTTACAGTCAAATTAATTCTAATTATCTCTCTACA  
GCCTTGTATCGTATATGCAAATATGAAGGAATCATGGGAAATAGGCCCTCTTCCTGC  
CCGACCTAGCAAAAAATGGAGGGGGACGGATTCGAACCGCCGAACCCAAAGGGAG  
CGGATTTAGAGTCCGCCGCGTTTAGCCACTTCGCTACCCCTCCGGTGTCTCTACT  
GATAGGGAACCTTATAAGTCTCTACTGATAGGGATTTACGTTTATGGTGATTTT

CCAGAACACATAGCGACATGCAAATATTAATAAAATGGTGGGGGAAGGATTCGAACC  
TTCGAAGTCTGTGACGGCAGATTTAGAGTCTGCTCCCTTTGGCCGCTCGGGAACCCC  
ACCGGTGTTTCGTCCTTTCCACAAGATATATAAAGCCAAGAAATCGAAATACTTTCA  
AGTTACGGTAAGCATATGATAGTCCATTTTAAAACATAATTTTAAAACACTGCAAATA  
CCCAAGAAATTACTTTCTACGTCACGTATTTTGTACTAATATCTTTGTGTTTACA  
GTCAAATTAATTCTAATTATCTCTCTAACAGCCTTGTATCGTATATGCAAATATGAAG  
GAATCATGGGAAATAGGCCCTCTTCCTGCCCGA<sub>c</sub>CTAGCAAAAAATGGAGGGGGAC  
GGATTCGAACCGCCGAACCCAAAGGGAGCGGATTTAGAGTCCGCCGCGTTTAGCCA  
CTTCGCTACCCCTCCGGTGTCTCTACTGATAGGGA<sub>c</sub>ACTTATAAGTCTCTACT  
GATAGGGATTTACGTTTATGGTGATTTCCAGAACACATAGCGACATGCAAATATT  
AAAAATGGTGGGGGAAGGATTCGAACCTTCGAAGTCTGTGACGGCAGATTTAGAG  
TCTGCTCCCTTTGGCCGCTCGGGAACCCCACCGGTGTTTCGTCCTTTCCACAAGATAT  
ATAAAGCCAAGAAATCGAAATACTTTCAAGTTACGGTAAGCATATGATAGTCCATTT  
TAAAACATAATTTTAAAACACTGCAAATACTTCCAAAGAAATTACTTTCTACGTCACG  
TATTTTGTACTAATATCTTTGTGTTTACAGTCAAATTAATTCTAATTATCTCTCTAACA  
GCCTTGTATCGTATATGCAAATATGAAGGAATCATGGGAAATAGGCCCTCTTCCTGC  
CCGACCTAGCAAAAAATGGAGGGGGACGGATTCGAACCGCCGAACCCAAAGGGAG  
CGGATTTAGAGTCCGCCGCGTTTAGCCACTTCGCTACCCCTCCGGTGTCTCTACT  
GATAGGGA<sub>c</sub>ACTTATAAGTCTCTACTGATAGGGATTTACGTTTATGGTGATTTCC  
CAGAACACATAGCGACATGCAAATATTAATAAAATGGTGGGGGAAGGATTCGAACC  
TTCGAAGTCTGTGACGGCAGATTTAGAGTCTGCTCCCTTTGGCCGCTCGGGAACCCC  
ACCGGTGTTTCGTCCTTTCCACAAGATATATAAAGCCAAGAAATCGAAATACTTTCA  
AGTTACGGTAAGCATATGATAGTCCATTTTAAAACATAATTTTAAAACACTGCAAATA  
CCCAAGAAATTACTTTCTACGTCACGTATTTTGTACTAATATCTTTGTGTTTACA  
GTCAAATTAATTCTAATTATCTCTCTAACAGCCTTGTATCGTATATGCAAATATGAAG  
GAATCATGGGAAATAGGCCCTCTTCCTGCCCGA<sub>c</sub>CTAGCAAAAAATGGAGGGGGAC  
GGATTCGAACCGCCGAACCCAAAGGGAGCGGATTTAGAGTCCGCCGCGTTTAGCCA  
CTTCGCTACCCCTCCGGTGTCTCTACTGATAGGGA<sub>c</sub>ACTTATAAGTCTCTACT  
GATAGGGATTTACGTTTATGGTGATTTCCAGAACACATAGCGACATGCAAATATT  
AAAAATGGTGGGGGAAGGATTCGAACCTTCGAAGTCTGTGACGGCAGATTTAGAG  
TCTGCTCCCTTTGGCCGCTCGGGAACCCCACCGGTGTTTCGTCCTTTCCACAAGATAT  
ATAAAGCCAAGAAATCGAAATACTTTCAAGTTACGGTAAGCATATGATAGTCCATTT  
TAAAACATAATTTTAAAACACTGCAAATACTTCCAAAGAAATTACTTTCTACGTCACG  
TATTTTGTACTAATATCTTTGTGTTTACAGTCAAATTAATTCTAATTATCTCTCTAACA  
GCCTTGTATCGTATATGCAAATATGAAGGAATCATGGGAAATAGGCCCTCTTCCTGC  
CCGAC<sub>c</sub>tagtcaataatcaatgtcaacgcgtatatctggcccgtacatcgcaagcagcgcaaacGGATCC<sub>c</sub>gcaggtatttGC  
GGCCGC<sub>c</sub>ggtccgtatactccggaatattaatagatcatggagataaataaataataaccatctcgcaataaataagtatcttactgtttc  
gtaacagtttgaataaaaaaacctataaataatccggattatcataccgtcccaccatcgggcg<sub>c</sub>AACTCCTAAAAAAC  
GCCACC<sub>c</sub>atgaagtgcctttgtacttagccttttattcattgggggtgaattgcaagttcaccatagttttcacacaacaaaaaggaac  
tggaaaaatgtccttctaattaccattattgccgtcaagctcagattaaattggcataatgacttaataggcacagccttacaagtcaaatg  
cccaagagtcaaacggtattcaagcagacggttgatgtgtcatgctccaatgggtcactactgtgattccgctggatggaccgaag  
atataacacattccatccgatcttccatctgtagaacaatgcaaggaagcattgaacaacgaaacaaggaacttggtgatccag  
gctccctcctcaagttgtgatgcaactgtgacggatgccgaagcagtgattgtccaggtgactcctcaccatgtgctggtgatgaata



cacaggagaatgggttgattcacagttcatcaacggaaaatgcagcaattacatatgccccactgtccataaactetacaacctggcattctga  
ctataaggtaaagggtatgtgatttaacctcatttccatggacatcaccttctctcagaggacggagagctatcatccctgggaaaggag  
ggcacagggttcagaagtaactactttgcttatgaaactggaggcaaggcctgcaaaatgcaatactgcaagcattggggagtcagactcc  
catcaggtgtctgggtcagatggctgataaggatctttgctgcagccagattccctgaatgccagaagggtcaagtatctctgctccatc  
tcagacctcagtgatgtaagtctaattcaggacgttgagaggatcttgattattccctctgccaagaaacctggagcaaaatcagagcgg  
gtctccaatctctccagtggatctcagctatcttctcctaaaaaccaggaaccggctctgcttcaccataatcaatgtaccctaaaact  
ttgagaccagatacatcagagtcgatattgctgctccaatcctctcaagaatggtcggaatgatcagtggaactaccacagaaagggaactg  
tgggatgactgggcacatataagacgtggaaattggaccaatggagttctgaggaccagttcaggatataagttcctttatcatgattg  
gacatggtatggtgactccgatcttcttagctcaaaggctcaggtgttcgaacatctcacattcaagacgctgcttcgcaactctgat  
gatgagagttatttttgggtgatactgggctatccaaaaatccaatcagcttgtagaagggtggttcagtagttgaaaagctctattgcctctt  
tttctttatcatagggttaactattggactattcttgggtctccgagttggtatccatctttgattaaattaaagcacaccaagaaaagacagattt  
atacagacatagagatgaaccgacttgaaaagtataaggccaggccggccaagcttctcagagaagtactagaggatcataatcagccat  
accacattgtagaggtttacttcttataaaaaacctcccacacctccccctgaacctgaaacataaaatgaatgcaattgtgtgtaactgtt  
tattgcagcttataatggttacaataaagcaatagcatcacaaatfcacaataaagcatttttctactgcattctagttgtggtttgtccaaact  
catcaatgtatcttatcatgtctggatctgatcactgcttgagcctaggagatccgaaccagataagtgaaatctagttccaaactatttgcattt  
ttaatttcgtattagcttacgacgctacaccagttccatctatfttgcactcttcctaaataatccttaaaaactccattccaccctcccagt  
tcccaactatttgcgccccacagcggggcattttctctctgttatgttttaatacaacatcctgccaactccatgtgacaaaccgtcatcttcg  
gctacttt

*pB3-SulfoRS-16xYtR-TAG-HCII*: pAcBac3 OMeYRS was used as a starting vector to construct this plasmid.<sup>1</sup> pB3 (abbreviated pAcBac3) is identical to pB1u except it contains a CAG promoter upstream from an SfiI site as well as 4 additional tRNA cassette copies. OMeYRS was replaced with SulfoRS via NheI/XhoI as previously described in pB1U cloning description. The SfiI site was used to insert HCII. HCII-SfiI-F and 10xHis-TGA-SfiI-R were used to amplify HCII from pCMV-SerpinD1 (Origene, SC120039). Mutations were introduced via overlap extension (see primer list for 79, 92, and 80 overlap primers – 79 and 92 correspond to 60 and 73 sites, respectively).

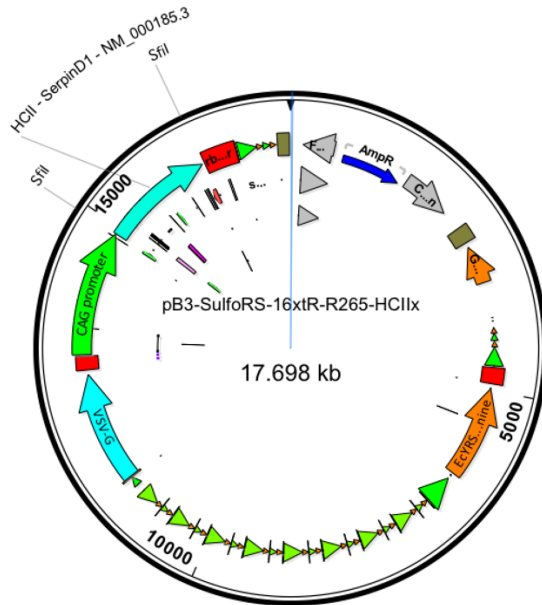

cctggtatggttttaatacaaacatcctgccaactccatgtgacaaaaccgtcatcttcggctacttttctctgtcacagaatgaaaatcttctgtcatc  
tcttcgttataatggttgaattgactgaatatcaacgcttatttgcagcctgaatggcgaatgggacgcgccctgtagcggcgcattaagcgc  
ggcgggtgtggtggttacgcgcagcgtgaccgctacactgccagcgcctagcgcgccgctcttctgctttctccttcttctgccacg  
ttcggcggcttccccgtcaagctcaaatcgggggctcccttaggggtccgattagtgtttacggcacctcgaccccaaaaactgatta  
gggtgatggttcacgtagtggccatcgccctgatagacgggttttcgcccttgacgttgagtcacggttcttaaatagtgactctgtcca  
aactggaacaacactcaaccctatctcggctattctttgattataagggattttgccgatttcggcctattggttaaaaaatgagctgattaac  
aaaaatthaacgcgaatttaacaaaatattaacgtttacaattcaggtggcacttttcggggaaatgtgcgcggaaccctattggtttttct  
aaatacattcaaatatgtatccgctcatgagacaataaccctgataaatgctcaataatattgaaaaaggaagagtatgagtattcaacattcc  
gtgtcgccttattccctttttgcggcattttgccttctgtttttgctcaccagaaacgctgggtgaaagtaaaagatgctgaagatcagttggg  
tgacagagtgggttacatcgaactggatcacaacagcggtaagatccttgagagttttcggccgaagaacgtttccaatgatgagcactttt  
aaagtctgctatgtggcgcggtattatcccgtattgacggcgggaagagcaactcggctgccgcatacactattcagaatgacttggtg  
agtactcaccagtcacagaaaagcatcttacggatggcatgacagtaagagaattatgcagtgctgccataaccatgagtataactgcg  
gccaacttactctgacaacgatcggaggaccgaaggagtaaccgctttttgcacaacatgggggatcatgtaactgccttgatcgttg  
gaaccggagctgaatgaagccatacacaacgacgagcgtgacaccagatgcctgtagcaatggcaacaacgttgcgcaaaactattaact  
ggcgaactacttacttagcttcccggcaacaattaatagactggatggaggcggataaagtgcaggaccacttctgcctcggccctcc  
ggctggtggtttattgctgataaatctggagccggtgagcgtgggtctcgcggtatcattgcagcactggggccagatgtaagccctcc  
gtatcgtatgtatctacacgacggggagtcaggcaactatggatgaacgaaatagacagatcgtgagataggtgcctcactgattaagcat  
tgtaactgtcagaccaagttactcatatatacttttagattgatttaaaacttcatttttaaaagatctaggtgaagatccttttgataatc

catgacaaaaatcccttaacgtgagtttctgtccactgagcgtcagaccccgtagaaaagatcaaaggatcttcttgagatcctttttctgcg  
cgtaatctgctgcttgaacaacaaaaaccaccgctaccagcgggtggttggccggatcaagagctaccaactctttccgaaggtaac  
ggcttcagcagagcgcagatacaaaactgtccttctagtgtagccgtagttagccaccactcaagaactctgtagcaccgcctacatac  
ctcgtctgctaactctgtaccagtggctgctgccagtggcgataagtcgtcttaccgggttgactcaagacgatagttaccggataag  
gcgagcggctgggctgaacggggggtcgtgcacacagcccagcttgagcgaacgacctacaccgaactgagatacctacagcgtg  
agcattgagaaagcggcaccgctcccgaaggagaaaggcggacaggtatccgtaagcggcagggtcgaacaggagagcgcacg  
agggagcttccaggggaaacgcctggtatctttatagtctgtcgggttcgccacctctgacttgagcgtcgtattttgtatgctcgtcag  
ggggcggagcctatgaaaaacgccagcaacgcggccttttacggctcctggccttttctgctgacctttgtccatgttcttctgcgtat  
cccctgattctgtgataaccgtattaccgctttgagtgagctgataaccgctcggcgcagccgaacgaccgagcgcagcagtcagtgag  
cgaggaagcggagagcgcctgatgcggtattttctcttacgcatctgtgcggtatttcacaccgcagaccagccgcgtaacctggcaaa  
atcggttacgggtgagtaataatggatgcctgcgtaagcgggtggtggcgacaataaagcttaaacgaacaaaatagatctaaactat  
gacaataaagcttaaacagacagaatagttgtaaactgaaatcagtcaggtatgctgtgaaaaagcactggtactttgttatggctaaag  
caactcttctttctgaagtgcgaattcccgtctattaaagaggggctggccaaggcaggtgtaaaactatattcgcggcgttga  
caattaccgaacaactccgcggcgggaagccgatctcggctgaacgaattgtaggtggcggctactgggtcgatatacaagtcatca  
cttctcccgtatcccaactttgtatagagagccactcgggatcgtaccgtaatctgctgcacgtagatcacataagccaagcgcgtt  
ggcctcatgcttgaggagattgatgagcgcggtggcaatgccctgcctccgggtcgcgggagactgcgagatcatagatatagatctca  
ctacgcggctgctcaaacctgggcagaacgtaagccgcgagagcgcgaacaaccgcttcttggtcgaaggcagcaagcgcgatgaatgt  
cttactacggagcaagtcccaggtaatcggagtcggctgatgtgggagtaggtggctacgtctccgaactcacgaccgaaaagatca  
agagcagcccgcaggttacttggtcagggccgagcctacatgtgcgaatgatgccatactgagccacctaactttgttttagggcga  
ctgccctgctgcgtaacatcgttgcgtcgcgtaacatcgttgcctcacaacatcgaaccacggcgtaacgcgcttgcgttgcgtt  
gatcccggagcatagactgtacaaaaaacagtcataacaagccatgaaaaccgactgcgcttaccaccgctgcgttcggtaag  
gttctggaccagttgcgtgagcgcatacgtactgcattacagtttacgaaccgaacaggcttatgtcaactgggtcgtccttcatccgtt  
ccaggtgtgctcaccggcaaccttgggcagcagcgaagtcgaggaatttctgctcgtggcgaacgagcgcgaaggttcggctc  
cacgcatcgcagcaggttggcggccttgcgttcttctacggcaaggtgctgtgcacggatctgccctggctcaggagatcggtagacctc  
ggcctcgcggcgttggcgggtgctgacctggatgaagtgttcgcatcctcggtttctggaaggcagcagcgttggcggccag  
gactctagctatagttctagtgttggtctacgtaccgtagtggctatggcagggttgcgcttaatgcggcgtacagggcgcgtgggat  
accccctagagcccagctgAAAAATGGAGGGGGACGGATTTCGAACCGCCGAACCCAAAGGG  
AGCGGATTTAGAGTCCGCCGCGTTTAGCCACTTCGCTACCCCTCCGGTGTCTCTATC  
ACTGATAGGGAACCTTATAAGTCTCTATCACTGATAGGGATTTACGTTTATGGTGAT  
TTCCCAGAACACATAGCGACATGCAAATATTAATAAATGGTGGGGGAAGGATTCGA  
ACCTTCGAAGTCTGTGACGGCAGATTTAGAGTCTGCTCCCTTTGGCCGCTCGGGAAC  
CCCACCGGTGTTTCGTCCTTTCCACAAGATATATAAAGCCAAGAAATCGAAATACTT  
TCAAGTTACGGTAAGCATATGATAGTCCATTTTAAAACATAATTTTAAACTGCAAA  
CTACCCAAGAAATTACTTTCTACGTCACGTATTTTGTACTAATATCTTTGTGTTT  
ACAGTCAAATTAATTCTAATTATCTCTCTAACAGCCTTGTATCGTATATGCAAATATG  
AAGGAATCATGGGAAATAGGCCCTTTCCTGCCCGAGATCTGgttcttccgctcagaagccatag  
agcccaccgcatcccagcatgctgtattgtcttccaatctcccccttgcgtcctgccccaccaccagcaatagaatgacacc  
tactagacaatgcgatgcaatttctcattttattagaaaggacagtgagggtggcaccttccagggtcaaggagggcaggggggaggg  
gcaacaacagatggctggcaactagaaggcagtcgaggtgatcagcgggttaaacgggccccttagactcgagttaaagtcgact  
taacgcttgaattcttaacgggccccttccagcaaatcagacagtaattctttaccgcgacgcagtaaggtaaacgaccaaacagacg  
atcttctttaaagaagtattcaggatcggactgttttaccgtaatgggtgatggcattggaggcgatgtttactgacctgaccagggga  
aggttgcagttcagaatcgaccagtcctgcatcaggtctgcgccctttccatctcaaccatcggtagccgctcctgcgccagctgttcgaa  
gtccgctcactcagegcactcaagaaccgctgaacaggcattcggtaatacgtttgcccctgtaaactcttaccgtgaaccagacg

agtcacctgctccgccagtaacatactgggcgcgcgggtgctttaccgctgtttttatcttcttccaggcgttgatcttcaatgctcataaag  
gtgaagaacttcaggaagcggtaaactgcggcatccgcagtggtgatccagaactggtagaattgtacgggctggtttctcgggtccaac  
cagactgcgccgccttcagttttaccaaatttggtgccatctgctttagtgatcagcgggaacggtcaggccaaacacctgattctgatgcagac  
gacgggtcaggtcgataaccagaagtgatgttaccattggtcagaaccaccaatttgacgaccacaccgtactgtttgtagcacaggcc  
ataccataacctggagcaggtgtaggaaaactcagtgaaacgaaatcccctgacctcaggttgagacgctgcttaaccgctctttgtga  
tcactggttaacggagaagtgtttgccaatcgcgcaggaaggtcagcacattcatattgccgaaccagtcataattattggccgcgatag  
cagagttttctccacagtcgaaatcgaggaacggggcaacctgcttacggattttgtccaccactcctgaacagtttctcgggttcagctta  
cgctcggcagctttgaagctcgggtcgccaatcagaccgtcgcgcgcctaccagcgaaccggcttggtggccgcctgctggaagcg  
tttcaggcataacaatggaacaagatgccccaaatgcaagctgcagcggtaggatcgaagccacaaatgagtgatcgggcttgcgc  
cagtcgctctgctaacgcttctcgtccgtcacctgggctaccagccccgctcttgaattgttaataagttactgcttgcctGGTGG  
CgtagccagcttgggtctccctatagtgagtcgtattaatttcgataagccagtaagcagtggttctctagtttagccagagagctCtagac  
caagtgcagatcacagcgtaccacaaacaagaaccgcgacccaaatcccggctgcgacggaactagctgtgccacaccggcgctcc  
ttatataatcatcggcgttaccgccccacggagatccctccgcagaatcgccgagaagggactcttctcgcctgttccgctctctgga  
aagaaaaccagtgccctagagtcaccaagtcccgtcctaaaatgtccttctgctgatactggggttctaaggccgagcttatgagcagcg  
ggcctgctcctgagcgtccggcggaaggatcaggacgctcgtcgcctctcgtctgacgtggcagcgtcccggtgaggaggggg  
gccccgcgggagcgccaaaacccggcgcgaggccttcgaacggCCACTAGCAAAAAATGGAGGGGGAC  
GGATTTCGAACCGCCGAACCCAAAGGGAGCGGATTTAGAGTCCGCCGCGTTTAGCCA  
CTTCGCTACCCCTCCGGTGTCTCTACTGATAGGGAACCTTATAAGTCTCTACT  
GATAGGGATTTACGTTTATGGTGATTTCCAGAACACATAGCGACATGCAAATATT  
AAAAATGGTGGGGGAAGGATTCGAACCTTCGAAGTCTGTGACGGCAGATTTAGAG  
TCTGCTCCCTTTGGCCGCTCGGGAACCCACCGGTGTTTTCGTCCTTTCCACAAGATAT  
ATAAAGCCAAGAAATCGAAATACTTTCAAGTTACGGTAAGCATATGATAGTCCATTT  
TAAACATAATTTTAAACTGCAAACCTACCCAAGAAATTATTACTTTCTACGTCACG  
TATTTTGTACTAATATCTTTGTGTTTACAGTCAAATTAATTCTAATTATCTCTAACA  
GCCTTGTATCGTATATGCAAATATGAAGGAATCATGGGAAATAGGCCCTCTTCCTGC  
CCGAcCTAGCAAAAAATGGAGGGGGACGGATTCGAACCGCCGAACCCAAAGGGAGC  
GGATTTAGAGTCCGCCGCGTTTAGCCACTTCGCTACCCCTCCGGTGTCTCTACTG  
ATAGGGAACCTTATAAGTCTCTACTGATAGGGATTTACGTTTATGGTGATTTCCC  
AGAACACATAGCGACATGCAAATATTA AAAAATGGTGGGGGAAGGATTCGAACCTT  
CGAAGTCTGTGACGGCAGATTTAGAGTCTGCTCCCTTTGGCCGCTCGGGAACCCAC  
CGGTGTTTTCGTCCTTTCCACAAGATATATAAAGCCAAGAAATCGAAATACTTTCAAG  
TTACGGTAAGCATATGATAGTCCATTTTAAACATAATTTTAAACTGCAAACCTACC  
CAAGAAATTATTACTTTCTACGTCACGTATTTTGTACTAATATCTTTGTGTTTACAGT  
CAAATTAATTCTAATTATCTCTCTAACAGCCTTGTATCGTATATGCAAATATGAAGG  
AATCATGGGAAATAGGCCCTCTTCCTGCCCCGACCTAGCAAAAAATGGAGGGGGACG  
GATTCGAACCGCCGAACCCAAAGGGAGCGGATTTAGAGTCCGCCGCGTTTAGCCAC  
TTCGCTACCCCTCCGGTGTCTCTACTGATAGGGAACCTTATAAGTCTCTACTG  
ATAGGGATTTACGTTTATGGTGATTTCCAGAACACATAGCGACATGCAAATATTA  
AAAAATGGTGGGGGAAGGATTCGAACCTTCGAAGTCTGTGACGGCAGATTTAGAGT  
CTGCTCCCTTTGGCCGCTCGGGAACCCACCGGTGTTTTCGTCCTTTCCACAAGATATA  
TAAAGCCAAGAAATCGAAATACTTTCAAGTTACGGTAAGCATATGATAGTCCATTTT  
AAACATAATTTTAAACTGCAAACCTACCCAAGAAATTATTACTTTCTACGTCACGT  
ATTTTGTACTAATATCTTTGTGTTTACAGTCAAATTAATTCTAATTATCTCTAACA

GCCTTGTATCGTATATGCAAATATGAAGGAATCATGGGAAATAGGCCCTCTTCCTGC  
CCGA<sub>c</sub>CTAGCAAAAAATGGAGGGGGACGGATTCGAACCGCCGAACCCAAAGGGAGC  
GGATTTAGAGTCCGCCGCGTTTAGCCACTTCGCTACCCCTCCGGTGTCTCTATCACTG  
ATAGGGAACCTTATAAGTCTCTATCACTGATAGGGATTTACGTTTATGGTGATTTCCC  
AGAACACATAGCGACATGCAAATATTAATAAATGGTGGGGGAAGGATTCGAACCTT  
CGAAGTCTGTGACGGCAGATTTAGAGTCTGCTCCCTTTGGCCGCTCGGGAACCCAC  
CGGTGTTTCGTCCTTTCCACAAGATATATAAAGCCAAGAAATCGAAATACTTTCAAG  
TTACGGTAAGCATATGATAGTCCATTTTAAAACATAATTTTAAAACCTGCAAACCTACC  
CAAGAAATTATTACTTTCTACGTCACGATTTTGTACTAATATCTTTGTGTTTACAGT  
CAAATTAATTCTAATTATCTCTCTAACAGCCTTGTATCGTATATGCAAATATGAAGG  
AATCATGGGAAATAGGCCCTCTTCCTGCCCCGACCTAGCAAAAAATGGAGGGGGACG  
GATTCGAACCGCCGAACCCAAAGGGAGCGGATTTAGAGTCCGCCGCGTTTAGCCAC  
TTCGCTACCCCTCCGGTGTCTCTATCACTGATAGGGAACCTTATAAGTCTCTATCACTG  
ATAGGGATTTACGTTTATGGTGATTTCCCAGAACACATAGCGACATGCAAATATTA  
AAAAATGGTGGGGGAAGGATTCGAACCTTCGAAGTCTGTGACGGCAGATTTAGAGT  
CTGCTCCCTTTGGCCGCTCGGGAACCCACCGGTGTTTCGTCCTTTCCACAAGATATA  
TAAAGCCAAGAAATCGAAATACTTTCAAGTTACGGTAAGCATATGATAGTCCATTTT  
AAAACATAATTTTAAAACCTGCAAACCTACCCAAGAAATTATTACTTTCTACGTCACGT  
ATTTTGTACTAATATCTTTGTGTTTACAGTCAAATTAATTCTAATTATCTCTCTAACA  
GCCTTGTATCGTATATGCAAATATGAAGGAATCATGGGAAATAGGCCCTCTTCCTGC  
CCGA<sub>c</sub>CTAGCAAAAAATGGAGGGGGACGGATTCGAACCGCCGAACCCAAAGGGAGC  
GGATTTAGAGTCCGCCGCGTTTAGCCACTTCGCTACCCCTCCGGTGTCTCTATCACTG  
ATAGGGAACCTTATAAGTCTCTATCACTGATAGGGATTTACGTTTATGGTGATTTCCC  
AGAACACATAGCGACATGCAAATATTAATAAATGGTGGGGGAAGGATTCGAACCTT  
CGAAGTCTGTGACGGCAGATTTAGAGTCTGCTCCCTTTGGCCGCTCGGGAACCCAC  
CGGTGTTTCGTCCTTTCCACAAGATATATAAAGCCAAGAAATCGAAATACTTTCAAG  
TTACGGTAAGCATATGATAGTCCATTTTAAAACATAATTTTAAAACCTGCAAACCTACC  
CAAGAAATTATTACTTTCTACGTCACGATTTTGTACTAATATCTTTGTGTTTACAGT  
CAAATTAATTCTAATTATCTCTCTAACAGCCTTGTATCGTATATGCAAATATGAAGG  
AATCATGGGAAATAGGCCCTCTTCCTGCCCCGACCTAGCAAAAAATGGAGGGGGACG  
GATTCGAACCGCCGAACCCAAAGGGAGCGGATTTAGAGTCCGCCGCGTTTAGCCAC  
TTCGCTACCCCTCCGGTGTCTCTATCACTGATAGGGAACCTTATAAGTCTCTATCACTG  
ATAGGGATTTACGTTTATGGTGATTTCCCAGAACACATAGCGACATGCAAATATTA  
AAAAATGGTGGGGGAAGGATTCGAACCTTCGAAGTCTGTGACGGCAGATTTAGAGT  
CTGCTCCCTTTGGCCGCTCGGGAACCCACCGGTGTTTCGTCCTTTCCACAAGATATA  
TAAAGCCAAGAAATCGAAATACTTTCAAGTTACGGTAAGCATATGATAGTCCATTTT  
AAAACATAATTTTAAAACCTGCAAACCTACCCAAGAAATTATTACTTTCTACGTCACGT  
ATTTTGTACTAATATCTTTGTGTTTACAGTCAAATTAATTCTAATTATCTCTCTAACA  
GCCTTGTATCGTATATGCAAATATGAAGGAATCATGGGAAATAGGCCCTCTTCCTGC  
CCGA<sub>c</sub>CTAGCAAAAAATGGAGGGGGACGGATTCGAACCGCCGAACCCAAAGGGAGC  
GGATTTAGAGTCCGCCGCGTTTAGCCACTTCGCTACCCCTCCGGTGTCTCTATCACTG  
ATAGGGAACCTTATAAGTCTCTATCACTGATAGGGATTTACGTTTATGGTGATTTCCC  
AGAACACATAGCGACATGCAAATATTAATAAATGGTGGGGGAAGGATTCGAACCTT

CGAAGTCTGTGACGGCAGATTTAGAGTCTGCTCCCTTTGGCCGCTCGGGAACCCCAC  
CGGTGTTTCGTCCTTTCCACAAGATATATAAAGCCAAGAAATCGAAATACTTTCAAG  
TTACGGTAAGCATATGATAGTCCATTTTAAAACATAATTTTAAAACACTGCAAACCTACC  
CAAGAAATTACTTTCTACGTACGTATTTTGTACTAATATCTTTGTGTTTACAGT  
CAAATTAATTCTAATTATCTCTCTAACAGCCTTGTATCGTATATGCAAATATGAAGG  
AATCATGGGAAATAGGCCCTCTTCCTGCCCCGACctagtcaataatcaatgtcaacgcgtatatctggcccgt  
catcgccaagcagcgcaaaacGGATCCtgcaggtatGCGGCCGCGgtccgtatactccggaatattaatagatcatggagat  
aattaaatgataaccatctcgcaataaataagatcttactgtttcgtaacagtttgaataaaaaaacctataaataatccggtattcatac  
cgtcccaccatcgggcgcgAACTCCTAAAAAACCGCCACCatgaagtgcctttgtacttagccttttattcattgggggtg  
aattgcaagttaccatagttttccacacaacaaaaaggaactggaaaatgtccttctaattaccattattgccgtcaagctcagattta  
aattggcataatgacttaataggcagccttacaagtcaaaatgcccgaagtcacaaggctattcaagcagacgggttgatgtgatctg  
tccaaatgggtcactactgtgattccgctggtatggaccgaagtataaacacattccatccgatcctcactccatctgtagaacaatgcaa  
ggaaagcattgaacaaacgaacaaggaactgggtgaatccaggtccctcctcaaaagttgggatgcaactgtgacggatgccgaa  
gcagtgattgtccaggtgactcctcaccatgtgctggtgatgaatacacaggagaatgggtgattcacagttcatcaacggaaaatgcagc  
aattacatagccccactgtccataactctacaacctggcattctgactataaggtcaaaagggtatgtgattctaacctcattccatggacatc  
accttctctcagaggacggagagctatcatcctgggaaaggagggcacaggggtcagaagtaactcttgcattgaaactggaggcaa  
ggcctgcaaaatgaactgcaagcattggggagtcagactcccatcaggtgtctggttcgagatggctgataaggatctcttctgctgagc  
cagattccctgaatgccagaagggtcaagtatctctgctcactcagacctcagtggtatgaagtctaattcaggacgttgagaggatctg  
gattattccctctgccaagaaacctggagcaaaatcagagcgggtcttccaatctcctcagtggtatcagctatctgtcctcaaaaaccag  
gaaccggtcctgcttaccataatcaatggtaccctaaaactttgagaccagatacatcagagtcgatattgctgctccaatcctctcaaga  
atggtcggaatgatcagtggaactaccacagaaaggaactgtgggatgactgggcaccatagaagacgtgaaatggaccaatgga  
gttctgaggaccagttcaggatataagtttcttatacatgattggacatggtatggtgactccgatcttcatcttagctcaaaaggtcaggtg  
tcgaacatcctcattcaagacgctgctcgaactcctgatgatgagagtttatttttggatgactgggctatcaaaaatccaatcagc  
ttgtagaagggtggttcagtagttgaaaagctctattgcctctttttcttatacatagggttaatcattggactattctggttccagttggtatc  
catcttgcattaaattaaagcacaccaagaaaagacagattatacagacatagagatgaaccgactggaaagtataagtcgagaagtac  
tagaggatcataatcagccataccacattgtagaggtttacttgccttcaaaaacccacacctccccctgaacctgaacataaaatgaa  
tgcaattgttgttgaactgtttattgcagcttataatggtacaataaagcaatagcatcacaattcacaataaagcatttttactgcat  
tctagttgtggttgcctcaaacatcaatgatcttatcatgctggtatgatcactgcttgagcCTAGTTATTAATAGTAAT  
CAATTACGGGGTCATTAGTTCATAGCCATATATGGAGTTCGCGTTACATAACTTA  
CGGTAAATGGCCCGCCTGGCTGACCGCCAACGACCCCGCCATTGACGTCAATA  
ATGACGTATGTTCCCATAGTAACGCCAATAGGGACTTTCCATTGACGTCAATGGGTG  
GAgTATTTACGGTAAACTGCCACTTGGCAGTACATCAAGTGTATCATATGCCAAGT  
ACGCCCCCTATTGACGTCAATGACGGTAAATGGCCCGCCTGGCATTATGCCAGTAC  
ATGACCTTATGGGACTTTCTACTTGGCAGTACATCTACGTATTAGTCATCGCTATTA  
CCATGGTCGAGGTGAGCCCCACGTTCTGCTTCACTCTCCCCATCTCCCCCCCCCTCCCC  
ACCCCAATTTTGTATTTATTTATTTTAAATTATTTTGTGCAGCGATGGGGGCGGGG  
GGGGGGGGGGCGCGCGCCAGGCGGGGCGGGGCGGGGCGAGGGGCGGGGCGGGG  
GAGGCGGAGAGGTGCGGCGGCAGCCAATCAGAGCGGCGCGCTCCGAAAGTTTCCTT  
TTATGGCGAGGCGGCGGCGGCGGCCCTATAAAAAGCGAAGCGCGCGGCGGGC  
GGGAGTCGCTGCGTTGCCTTCGCCCCGTGCCCGCTCCGCGCCGCCTCGCGCCGCC  
GCCCCGGCTCTGACTGACCGCGTTACTCCCACAGGTGAGCGGGCGGGACGGCCCTTC  
TCCTCCGGGCTGTAATTAGCGCTTGGTTTAAATGACGGCTCGTTTCTTTTCTGTGGCTG  
CGTGAAAGCCTTAAAGGGCTCCGGGAGGGCCCTTTGTGCGGGGGGAGCGGCTCGG

GGGGTGCCTGCGTGTGTGTGTGCGTGGGGAGCGCCGCGTGC GGCCCCGCGCTGCCCG  
GCGGCTGTGAGCGCTGCGGGCGCGGGCGCGGGGCTTTGTGCGCTCCGCGTGTGCGCG  
AGGGGAGCGCGGCCGGGGGCGGTGCCCGCGGTGCGGGGGGGCTGCGAGGGGAAC  
AAAGGCTGCGTGC GGGGTGTGTGCGTGGGGGGGTGAGCAGGGGGTGTGGGCGCGGC  
GGTCGGGCTGTAACCCCCCTGCACCCCCCTCCCCGAGTTGCTGAGCACGGCCCCG  
CTTCGGGTGCGGGGCTCCGTGCGGGGCGTGGCGCGGGGCTCGCCGTGCCGGGCGGG  
GGGTGGCGGCAGGTGGGGGTGCCGGGCGGGGCGGGGCCCTCGGGCCGGGGAGG  
GCTCGGGGGAGGGGCGCGGGCGGCCCGGAGCGCCGGCGGCTGTCGAGGGCGCGGCG  
AGCCGCAGCCATTGCCTTTTATGGTAATCGTGCGAGAGGGCGCAGGGACTTCCTTTG  
TCCCAAATCTGGCGGAGCCGAAATCTGGGAGGCGCCGCCGACCCCCCTCTAGCGGG  
CGCGGGCGAAGCGGTGCGGCGCCGGCAGGAAGGAAATGGGCGGGGAGGGCCTTCG  
TGCGTCGCCGCGCCGCGTCCCCTTCTCCATCTCCAGCCTCGGGGCTGCCGCAGGGG  
GACGGCTGCCTTCGGGGGGGACGGGGCAGGGCGGGGTTTCGGCTTCTGGCGTGTGAC  
CGGCGGCTCTAGAGCCTCTGTAACCATGTTTCATGCCTTCTTCTTTTCTTACAGCTC  
CTGGGCAACGTGCTGGTTaTTGTGCTGTCTCATATTTTGGCAAAGAATTGGCCAAGG  
AGGCCACCatgaaacactcattaacgcacttctcatttctcatcataacatctgcgtgggggtgggagcaaaaggccccgctggatca  
gctagagaaaggaggggaaactgctcagctgcagatcccagtgaggagcagtaataacaaaaacctgagcatgcctcttctccctgcc  
gacttccacaaggaaaacaccgtcaccaacgactggattccagagggggaggaggacgacgactatctggacctggagaagatattcag  
tgaagacgacgactacatcgacatcgtcgacagtctgacagttccccgacagactctgatgtgagtgctgggaacatcctccagcttttcat  
ggcaagagccggatccagcgtcttaacatcctcaacgcccaagttcgtttcaaccttaccgagtctgaaagaccaggtcaacactttcga  
taacatctcatagcaccgftggcatttctactgcgatgggtatgatttcttaggtctgaaggagagaccatgaacaagtgcactcgattt  
tgcattftaaagactttgtaatgccagcagcaagatgaaatcacgaccattcataatctcttccgtaagctgactcatgcctcttcaggagga  
atfttgggtacacactgcggtcagtcacatgacctttatatccagaagcagtttcaatcctgcttgacttcaaaactaaagtaagagagtattact  
ttgctgagggccagatagctgacttctcagacctgccttcatataaaaaaccaacaaccacatcatgaaagctaccaagggccctcataaaa  
gatgctctggagaatatagaccctgctaccagatgatattctcaactgcacttacttcaaggatcctgggtgaataaattcccagtgga  
tgacacacaaccacaacttccgggtgaatgagagagaggtagtttaaggttccatgatgcagaccaagggggaacttctcgcagcaaatga  
ccaggagctggactgcgacatcctccagctggaatacgtggggggcatcagcatgtaattgtgggtcccacacaagatgctgggatgaa  
gacctcgaagcgaactgacaccccgggtggtggagagatggcaaaaaagcatgacaacagaactcgagaagtgcttctgccgaaat  
tcaagctggagaagaactacaatctagtggagtcctgaagttgatggggatcaggatgctgtttgacaaaaatggcaaatggcaggcat  
ctcagaccaaaggatcgccatcagctgttcaagcacaaggcagatcacagtgaacgaggaaggcaccacaagccactgtgacca  
cggtgggggtcatgcccgtgtccaccaagtccgcttactgtcgaccgcccccttcttctcatctacgagcaCcgaccagctgcctgc  
tcttcatgggaagagtggccaacccagcaggtccCATCATCACCATCATCATCACCACCATCATtGAggcc  
tgccggccgcccagcacagtggtcgatcgaCCAATGCCCTGGCTCACAAATACCACTGAGATCTTTTT  
CCCTCTGCCAAAAATTATGGGGACATCATGAAGCCCCTTGAGCATCTGACTTCTGGC  
TAATAAAGGAAATTTATTTTCATTGCAATAGTGTGTTGGAATTTTTTGTGTCTCTCAC  
TCGGAAGGACATATGGGAGGGCAAATCATTAAAACATCAGAATGAGTATTTGGTT  
TAGAGTTTGGCAACATATGCCcATATGCTGGCTGCCATGAACAAAGGTtGGCTATAA  
AGAGGTCATCAGTATATGAAACAGCCCCCTGCTGTCCATTCTTATTCCATAGAAAA  
GCCTTGACTTGAGGTTAGATTTTTTTTTATATTTTGTGTTTGTGTTATTTTTTTCTTTAAC  
ATCCCTAAAATTTTCTTACATGTTTTACTAGCCAGATTTTTCTCCTCTCCTGACTAC  
TCCAGTCATAGCTGTCCCTCTTCTTATGgAGATCCCTCGACCTGCcctaggTCGGGC  
AGGAAGAGGGCCTATTTCCCATGATTCCTTCATATTTGCATATACGATAACAAGGCTG  
TTAGAGAGATAATTAGAATTAATTTGACTGTAAACACAAAGATATTAGTACAAAAT

ACGTGACGTAGAAAGTAATAATTTCTTGGGTAGTTTGCAGTTTTAAAATTATGTTTTA  
AAATGGACTATCATATGCTTACCGTAACTTGAAAGTATTTGATTTCTTGGCTTTATA  
TATCTTGTGGAAAGGACGAAACACCGGTGGGGTTCCCGAGCGGCCAAAGGGAGCAG  
ACTCTAAATCTGCCGTCACAGACTTCGAAGGTTCGAATCCTTCCCCACCATTTTTTA  
ATATTTGCATGTCGCTATGTGTTCTGGGAAATCACCATAAACGTGAAATCCCTATCA  
GTGATAGAGACTTATAAGTTCCTATCAGTGATAGAGACACCGGAGGGGTAGCGAA  
GTGGCTAAACGCGGCGGACTCTAAATCCGCTCCCTTTGGGTTTCGGCGGTTCGAATCC  
GTCCCCcTCCATTTTTTgctaggagatccgaaccagataagtgaaatctagtccaaactatmtgcatmttaatttcgtattag  
cttacgacgctacaccagttcccatctatmtgtcactcttccctaaataatccttaaaaactccatttccaccctcccagttcccaactatmtgt  
ccgcccacagcggggcattttct
